# 1 Cellular translational enhancer elements that recruit eukaryotic initiation factor 3

2  
3 **Authors:** Jiří Koubek<sup>1</sup>, Rachel O. Niederer<sup>1</sup>, Andrei Stanciu<sup>2</sup>, Colin Echeverría Aitken<sup>2</sup> and  
4 Wendy V. Gilbert<sup>1\*</sup>

5  
6 **Affiliations:** <sup>1</sup>Yale School of Medicine, Department of Molecular Biophysics & Biochemistry,  
7 New Haven, CT 06520, USA. <sup>2</sup>Biology Department and Biochemistry Program, Vassar College,  
8 Poughkeepsie, NY 12604, USA.

9  
10 \*Correspondence to: [wendy.gilbert@yale.edu](mailto:wendy.gilbert@yale.edu) , [caitken@vassar.edu](mailto:caitken@vassar.edu)

## 11 **Abstract**

12 Translation initiation is a highly regulated process which broadly affects eukaryotic gene  
13 expression. Eukaryotic initiation factor 3 (eIF3) is a central player in canonical and alternative  
14 pathways for ribosome recruitment. Here we have investigated how direct binding of eIF3  
15 contributes to the large and regulated differences in protein output conferred by different 5'-  
16 untranslated regions (5'-UTRs) of cellular mRNAs. Using an unbiased high-throughput approach  
17 to determine the affinity of budding yeast eIF3 for native 5'-UTRs from 4,252 genes, we  
18 demonstrate that eIF3 binds specifically to a subset of 5'-UTRs that contain a short unstructured  
19 binding motif, AMAYAA. eIF3 binding mRNAs have higher ribosome density in growing cells  
20 and are preferentially translated under certain stress conditions, supporting the functional  
21 relevance of this interaction. Our results reveal a new class of translational enhancer and suggest  
22 a mechanism by which changes in core initiation factor activity enact mRNA-specific translation  
23 programs.  
24

## 25 **Introduction**

26 mRNA-specific translational activity – the number of protein molecules produced per mRNA –  
27 varies by orders of magnitude under normal growth conditions and is extensively regulated in  
28 response to a wide range of physiological signals (Ghazalpour et al., 2011; Lahtvee et al., 2017;  
29 Schwanhäusser et al., 2011; Vogel and Marcotte, 2012). 5'-untranslated regions (5'-UTRs)  
30 directly contact the translation initiation machinery and can strongly influence the rate of  
31 translation (Hinnebusch et al., 2016). For example, sequence differences between native yeast 5'-  
32 UTRs are sufficient to drive greater than hundred-fold differences in translation initiation (Rojas-  
33 Duran and Gilbert, 2012). Despite great progress towards illuminating the fundamental  
34 mechanisms by which eukaryotic mRNAs recruit ribosomes to initiate translation, many  
35 quantitatively large mRNA-specific differences in translation initiation remain unexplained.  
36

37  
38 For most cellular messages, translation initiation requires the concerted action of many  
39 eukaryotic initiation factors (eIFs). Cellular mRNAs begin with a 5'-m<sup>7</sup>G cap that is recognized  
40 by the eIF4E subunit of the cap binding complex, eIF4F. Ribosomes are recruited to mRNA as

41 43S pre-initiation complexes (PIC) that consist of a 40S small ribosomal subunit bound to eIF3, a  
42 ternary complex of eIF2•GTP•Met-tRNA<sub>i</sub>, and additional factors. During cap- and scanning-  
43 dependent initiation, the assembled PIC scans from 5' to 3' to find the start codon, at which point  
44 the 60S large ribosomal subunit joins and protein synthesis begins (Dever et al., 2016).  
45 Eukaryotic initiation factor 3 (eIF3) is a central player in this canonical pathway for translation  
46 initiation. eIF3 consists of five core subunits that are conserved from yeast to man with seven  
47 additional subunits present in filamentous fungi and multicellular eukaryotes (Cate, 2017;  
48 Valášek et al., 2017). Consistent with its large size and conservation, biochemical and structural  
49 studies reveal an extensive network of eIF3 interactions within the PIC, which stabilize the PIC  
50 and promote mRNA recruitment (Aitken et al., 2016; Valášek et al., 2017).

51  
52 eIF3 is also required for several non-canonical or cap-independent modes of translation.  
53 In vitro, eIF3 enhances ribosome binding to model cellular mRNAs in the absence of a cap  
54 (Mitchell et al., 2010). Four of the conserved subunits, eIF3a, b, c and g, contain RNA-binding  
55 domains that may bind mRNA as well as 40S ribosomes during initiation (Sun et al., 2013).  
56 Consistent with this possibility, crosslinking and immunoprecipitation of eIF3 from human 293T  
57 cells identified hundreds of specific crosslink sites mostly within 5'-UTRs (Lee et al., 2015).  
58 Further characterization of one eIF3 direct target, c-JUN, showed that eIF3 bound to a structured  
59 5'-UTR element and enhanced cap-dependent translation, although the majority of efficiently  
60 translated mRNAs did not crosslink to eIF3. Certain RNA viruses such as hepatitis C initiate  
61 translation without mRNA caps using structured 5'-UTR elements that bind to host eIF3 with  
62 high affinity (Filbin ME et al., 2009). Thus, direct binding of eIF3 to the 5'-UTR is sufficient to  
63 initiate downstream steps in translation initiation. Because this mode of ribosome recruitment is  
64 insensitive to regulatory mechanisms that target the activity of the cap binding complex, cap-  
65 independent and eIF3-dependent initiation is thought to play an important role in selective protein  
66 synthesis during times of stress (Gilbert, 2010; Shatsky et al., 2018). Whether high affinity  
67 binding to eIF3 is broadly significant for cellular translation activity was unknown.

68  
69 Here, we have used an unbiased high-throughput approach to determine the affinity of the  
70 yeast eukaryotic initiation factor 3 towards 5'-UTRs from 4,252 genes and then compared direct  
71 eIF3 binding to translation activity in cells. We incubated purified yeast eIF3 with a synthetic  
72 pool of 5'-UTRs at a range of protein concentrations and sequenced the bound RNAs to identify  
73 hundreds of specific binders. Quantitative filter binding assays validated specific 5'-UTRs as high  
74 affinity binders. We identified a sequence motif, AMAYAA, that was significantly enriched  
75 within unstructured regions of 5'-UTRs that bound eIF3 and found that mRNAs containing this  
76 5'-UTR motif show higher translation activity in rapidly growing yeast. mRNAs that bound eIF3  
77 in vitro maintained higher translation activity under conditions of limiting eIF3 and also during  
78 glucose starvation. Together, these results suggest a broad role for direct eIF3 binding to specific  
79 5'-UTR elements during normal and stress-responsive translation.

80

## 81 Results

82

### 83 A high-throughput assay for direct binding of eIF3 to specific 5'-UTRs

84 Because of the emerging role of eIF3 in mediating the translation of specific transcripts, we asked  
85 whether specific yeast mRNAs bind eIF3 with high affinity. Such direct binding to eIF3 could  
86 promote efficient translation in growing cells or contribute to selective protein synthesis during  
87 stress conditions where cap binding activity is downregulated. To survey the binding specificity  
88 of individual transcripts for eIF3 across the transcriptome, we performed RNA Bind-n-Seq  
89 (RBNS), a quantitative high-throughput assay for RNA binding affinity in vitro (Lambert et al.,  
90 2014). We designed an RNA library of sequences derived from deep sequencing of full-length  
91 yeast 5'-UTRs (Pelechano et al. 2014) (Methods). This pool included 5'-UTR sequences from  
92 4,252 genes.

93

94 eIF3 was purified from yeast cells and its activity confirmed by biochemical  
95 complementation of translation extracts from temperature-sensitive *prt1-1* cells lacking  
96 functional eIF3 as previously described (Phan et al., 1998) (Figure S1a, b). Purified eIF3 at  
97 various concentrations (0-1500 nM) was incubated with the 5'-UTR pool and bound RNA:eIF3  
98 complexes were separated from free RNA by passing through a nitrocellulose filter and used to  
99 prepare RNA sequencing libraries together with input RNA (Figure 1a). For each concentration,  
100 we determined an eIF3 enrichment score in the bound fraction as the relative frequency of a  
101 given RNA in the bound library compared to the input. The normalized reads for each eIF3  
102 concentration were highly reproducible between replicates (Figure 1b and Figure S1c). The  
103 replicate scores were therefore averaged in all subsequent analyses. Averaged eIF3 enrichment  
104 scores from adjacent eIF3 concentrations were highly correlated above 55 nM eIF3 (Spearman R  
105 > 0.9, Figure 1c), which is an indicator of good quality RBNS libraries (Lambert et al., 2014).

106

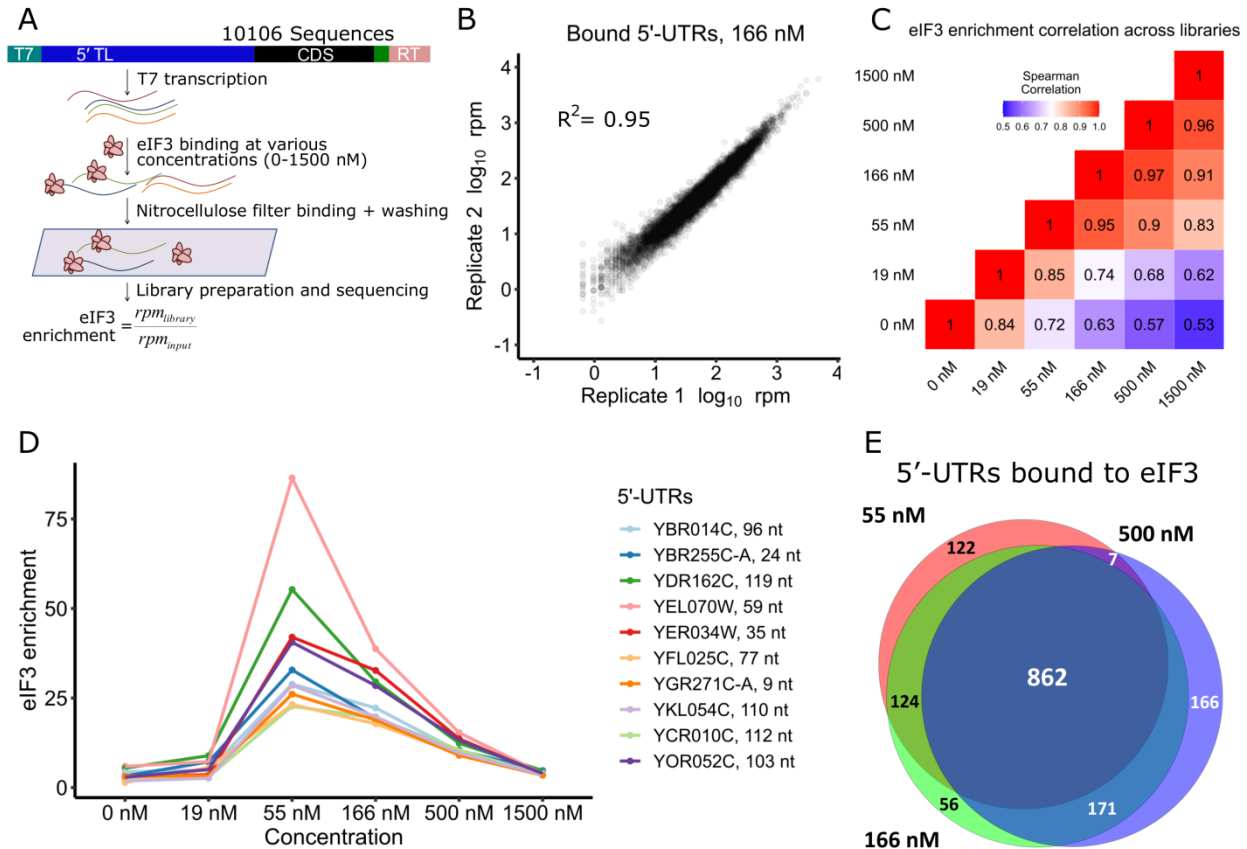

107  
 108 **Figure 1: Hundreds of natural yeast 5'-UTRs bind to eIF3 specifically.** a) Scheme of RNA  
 109 Bind-n-Seq (RBNS) assay. Designed DNA oligos encoding ~10,000 yeast 5'-UTRs are  
 110 transcribed in vitro. The resulting RNA pool is incubated with various concentrations of purified  
 111 eIF3, and protein-bound RNAs are captured on nitrocellulose and sequenced. Enrichment is the  
 112 frequency of a 5'-UTR in the bound sample normalized to input RNA. b) RBNS results are  
 113 reproducible. Shown are bound reads in two replicates of 166 nM eIF3. c) Enrichment between  
 114 55 and 500 nM eIF3 was well correlated. d) Enrichment of the top 10 eIF3 binders from the 166  
 115 nM library traced across all libraries. Peak enrichment at 55 nM eIF3 is consistent with high  
 116 affinity binding. Less enrichment at higher [eIF3] is expected because low-affinity RNAs  
 117 consume more of the sequencing lane. e) Overlap of 5'-UTRs bound in 55, 166, and 500 nM  
 118 libraries (red, green, and purple, respectively). See also Figure S1.

119  
 120 **Yeast eIF3 binds hundreds of natural 5'-UTRs with high affinity**

121 Next, we examined which 5'-UTRs are bound with high specificity to eIF3. We focused initially  
 122 on RNAs that were enriched in the 166 nM eIF3 library, which was selected as a representative  
 123 of specific binding because this concentration of eIF3 was both intermediate and well correlated  
 124 with adjacent concentrations (55 and 500 nM) (Figure 1c). Tracking the 10 most enriched 5'-  
 125 UTRs from the 166 nM library across all other libraries revealed an enrichment score peak in the  
 126 55 nM library, which is consistent with high-affinity binding of these RNAs to eIF3 (Figure 1d).  
 127 Reduced enrichment at higher concentrations of protein is expected as lower affinity binders take

128 up more of the sequencing space (Lambert et al., 2014). 5'-UTRs were defined as “bound” or  
129 “not bound” at each concentration of eIF3 using a standard deviation-like cutoff, enrichment > (1  
130 +range 33<sup>rd</sup> to 66<sup>th</sup> percentile), as previously described (Taliaferro et al., 2016). 5'-UTRs that  
131 bound non-specifically to nitrocellulose in the absence of eIF3 were eliminated from  
132 consideration (Figure S1d). Overall, we identified 1164 5'-UTRs bound in two or more adjacent  
133 concentrations of eIF3, with most of these (74%) showing binding at all three intermediate  
134 concentrations (55, 166 and 500 nM) (Figure 1e, Supplemental Table 1).

135  
136 Representative 5'-UTRs, which included eIF3 binders and non-binders, were tested by  
137 nitrocellulose filter binding with purified eIF3 at concentrations ranging from 15nM to 1 $\mu$ M to  
138 validate the results from RBNS and determine the  $K_d$  of binding (Methods). Out of eleven tested  
139 binders, nine bound to eIF3 with  $K_d$  values from 100 to 250 nM and two did not bind tightly ( $K_d$   
140 > 1000 nM) (Figures 2 and S2a-g). In parallel, we tested five non-binding 5'-UTRs (enrichment <  
141 1.59 in 166 nM library) from the RBNS assay, all of which bound weakly or not at all with  
142 affinities above the limit for reliable quantification ( $K_d$  > 1000 nM) (Figure S2h-l). These results  
143 validate specific high-affinity binding of individual targets identified from comprehensive testing  
144 of eIF3 binding to yeast 5'-UTRs and show that there are hundreds of different mRNAs whose 5'-  
145 UTRs confer preferential eIF3 binding.

146

147

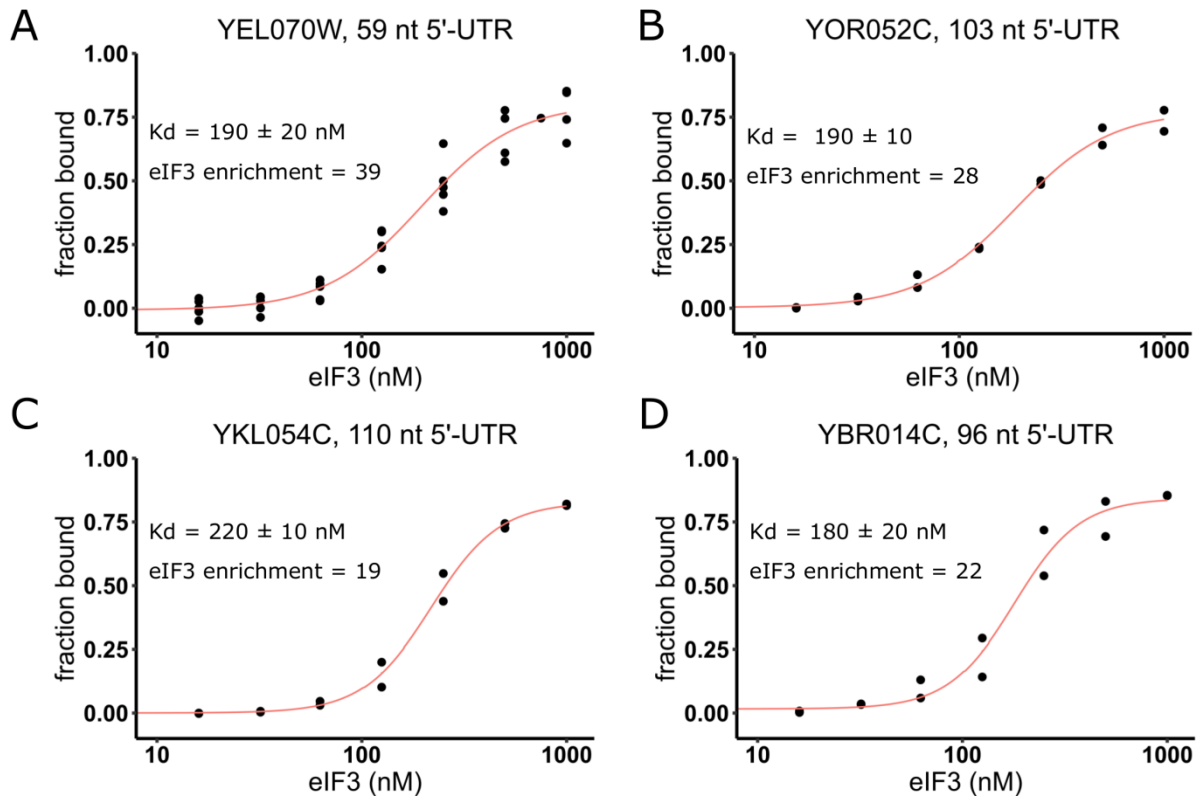

148  
149 **Figure 2: eIF3 binds to specific 5'-UTRs with nanomolar affinity.** Purified eIF3 (15 – 1000  
150 nM) was incubated with individual <sup>32</sup>P-labeled 5'-UTRs from *YEL070W* (a), *YOR052C* (b),  
151 *YKL054C* (c) and *YBR014C* (d). Experimental data points (black dots) were fit (red lines) to  
152 determine dissociation constants (Kd). Error reflects standard error of the fit of non-linear  
153 regression using Hill's equation. Enrichment score at 166 nM eIF3 is shown for comparison. See  
154 also Figure S2.

155  
156 **Bound 5'-UTRs are enriched in AMAYAA motifs in unstructured regions**  
157 Yeast eIF3 is composed of five distinct subunits, several of which contain known or potential  
158 RNA-binding domains, including two RNA-recognition motifs (RRM) and two helix–loop–helix  
159 (HLH) domains (Valášek et al., 2017), which have been found to mediate recognition of specific  
160 RNA sequence motifs by eIF3 and other proteins (Schuetz et al., 2014; Sun et al., 2013).  
161 Additionally, certain viral internal ribosomal entry sites (IRES) bind mammalian eIF3 with high  
162 affinity by forming an intricate RNA structure (Filbin ME et al., 2009; Walker et al., 2020). To  
163 investigate the mechanisms underlying specific binding of yeast eIF3 to a subset of 5'-UTRs, we  
164 first searched the bound RNAs from the 55, 166 and 500 nM libraries for short sequence motifs  
165 using DREME (Bailey et al., 2015). All three libraries yielded AMAYAA (where M=A or C and  
166 Y=C or U) as the most significantly enriched eIF3 binding motif with additional A-rich

167 sequences identified in each (Figures 3a and S3a). Therefore, we focused further analysis on the  
168 AMAYAA sequence.

169  
170 If the AMAYAA motif influences eIF3 binding, we reasoned that mRNAs containing  
171 more copies of this motif would display higher affinities for eIF3. We counted the motifs in each  
172 RNA and divided the pool based on the number of motifs in the sequence. We observed that the  
173 presence of the AMAYAA motif in the RNA significantly increases enrichment score in a dose-  
174 dependent manner for sequences with 0, 1, 2, or 3+ motifs ( $p < 1.5e-5$ , Figure 3b). This behavior is  
175 similar to other RNA binding proteins with known binding motifs which were analyzed using  
176 RBNS (Taliaferro et al., 2016), suggesting a bona fide sequence preference of eIF3 for  
177 AMAYAA. Overall, the enriched sequence motif AMAYAA can explain much of the observed  
178 binding specificity of purified eIF3, being present in 50.6% of binders (763 in 1508 binders).

179  
180 Not all 5'-UTRs with AMAYAA motifs bind eIF3 strongly, possibly due to an additional  
181 context requirement for recognition by eIF3. Binding of yeast eIF4G to its preferred sequence  
182 motif, oligo uridine, is favored when the motif is in an unstructured context (Zinshteyn et al.,  
183 2017). We therefore hypothesized that there is a structural difference between RNAs with  
184 AMAYAA that readily bind eIF3 and those that do not. Globally, eIF3 enrichment was positively  
185 correlated with folding energy of the RNA ( $R=0.42$ ,  $p=2.08e-279$ , Figure 3b), which is consistent  
186 with preferred binding of eIF3 to unstructured 5'-UTR sequences. To investigate the impact of  
187 RNA folding with nucleotide resolution, sequences containing at least one AMAYAA motif were  
188 ranked according to their enrichment score in the 166 nM library, aligned by the motif, and  
189 folded in silico using RNAfold (Figure 3c). Pairing probabilities for each nucleotide in a given  
190 bin were then averaged and plotted against nucleotide position relative to the motif. The observed  
191 nucleotide pairing probability of RNA tends to decrease with increasing enrichment (Figure S3b),  
192 with pairing probability over the motif being about 1.5-fold lower for the top decile compared to  
193 the bottom decile (Figure 3d). AMAYAA motifs are generally less likely to be paired than  
194 flanking sequences, likely due to the lack of G residues. Preferentially bound 5'-UTRs were also  
195 less folded immediately upstream and downstream of the motif. Together, these data are  
196 consistent with a preference for yeast eIF3 to bind AMAYAA motifs within unstructured regions  
197 of 5'-UTRs.

198

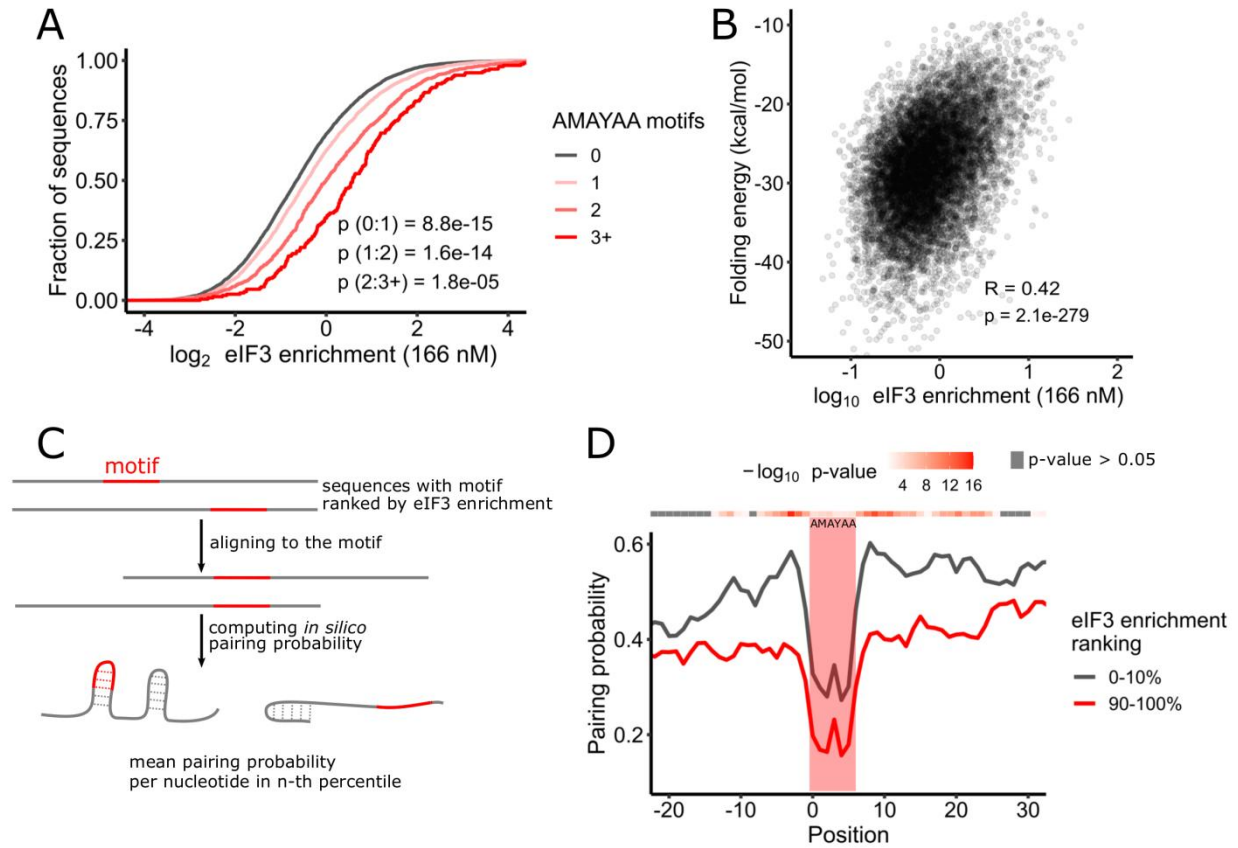

199  
 200 **Figure 3: eIF3 recognizes AMAYAA motifs in unstructured regions.** a) eIF3 binding  
 201 increases with increasing numbers of AMAYAA motifs. Distribution of observed enrichment  
 202 (166 nM eIF3) for 5'-UTRs with 0, 1, 2, and 3 or more AMAYAA motifs, p-adjusted (Mann-  
 203 Whitney) for selected pairwise comparisons. b) eIF3 preferentially binds unfolded 5'-UTRs.  
 204 Enrichment correlates (Pearson) with 5'-UTR folding energies calculated in RNAfold. c)  
 205 Overview of RNA motif structure analysis. d) AMAYAA motifs in tight binding 5'-UTRs (top  
 206 decile, red line) are more likely to be unpaired compared to motifs in weak binders (bottom  
 207 decile, grey line). Average nucleotide pairing probability of 5'-UTRs binned based on their enrichment  
 208 ranking in the 166 nM library. Position of the motif is indicated by the red rectangle. See also  
 209 Figure S3.

210  
 211  
 212 **eIF3 binders are preferentially translated in growing yeast and maintain higher translation**  
 213 **upon glucose starvation**

214 Ribosome footprint profiling and RNA sequencing have identified several 5'-UTR properties that  
 215 correlate with translation activity genome-wide (Weinberg et al., 2016), but most of the observed  
 216 variance in ribosome density still cannot be explained by current models. Thus, we asked whether  
 217 direct eIF3 binding has an impact on translation in cells. Ribosome density, the average number  
 218 of ribosome-protected footprints normalized to total mRNA levels, is a measure of translation



219 activity that is thought to be predominantly affected by mRNA-specific differences in translation  
220 initiation (Shah et al., 2013). We therefore compared ribosome density in exponentially growing  
221 yeast to eIF3 binding as approximated by enrichment in the 166 nM library. We restricted this  
222 analysis to 2469 genes with a dominant 5'-UTR isoform (Methods) because ribosome footprints  
223 observed within CDS regions cannot be assigned to a specific 5'-UTR isoform and many  
224 alternative 5'-UTR isoforms show differential binding to eIF3. In fact, 913 tested genes have  
225 isoforms with significantly different ( $p_{\text{adj}} < 0.05$ ) eIF3 enrichment (Figure S4a, Supplemental  
226 Table 2).

227  
228 The mRNAs with 5'-UTRs that bound eIF3 in vitro (Figure 1e) showed higher ribosome  
229 density genome-wide (Figure 4a and S4b). Globally, eIF3 enrichment was positively correlated  
230 with ribosome density ( $R = 0.18$ ,  $p=1.65e-18$ ) (Figure 4b and S4c). In addition, mRNAs  
231 containing a greater number of AMAYAA motifs display greater ribosome density per mRNA:  
232 one motif in the 5'-UTR increased median ribosome density by 20% and two motifs increased it  
233 by 49% (Figure 4c). Together, these results are consistent with a positive influence of eIF3  
234 binding on translation initiation for many genes.

235  
236 Next, we asked whether mRNAs with 5'-UTRs that preferentially bound eIF3 in vitro are  
237 able to maintain translation under conditions where eIF3 is limiting. We performed ribosome  
238 profiling in *tif32-td prt1-td* cells in which eIF3 levels were substantially depleted and bulk  
239 translation was reduced by ~80% (Jivotovskaya et al., 2006) (Figure S4d). The mRNAs that we  
240 observed to bind eIF3 in our RBNS experiments display greater ribosome occupancy upon eIF3  
241 complex depletion, which is consistent with the hypothesis that they compete for limiting eIF3  
242 under these conditions (Figure 4d). Interestingly, the apparent translational advantage of eIF3-  
243 binding mRNAs persisted in cells expressing a mutant form of eIF3i, *tif34DDKK*, which disrupts  
244 the eIF3i:eIF3b binding interface resulting in the loss of both eIF3i and eIF3g from the eIF3  
245 complex (Herrmannová et al., 2012) (Figure S4e). This result suggests the possibility that  
246 regulation of individual eIF3 proteins could mediate mRNA-specific translational control.

247

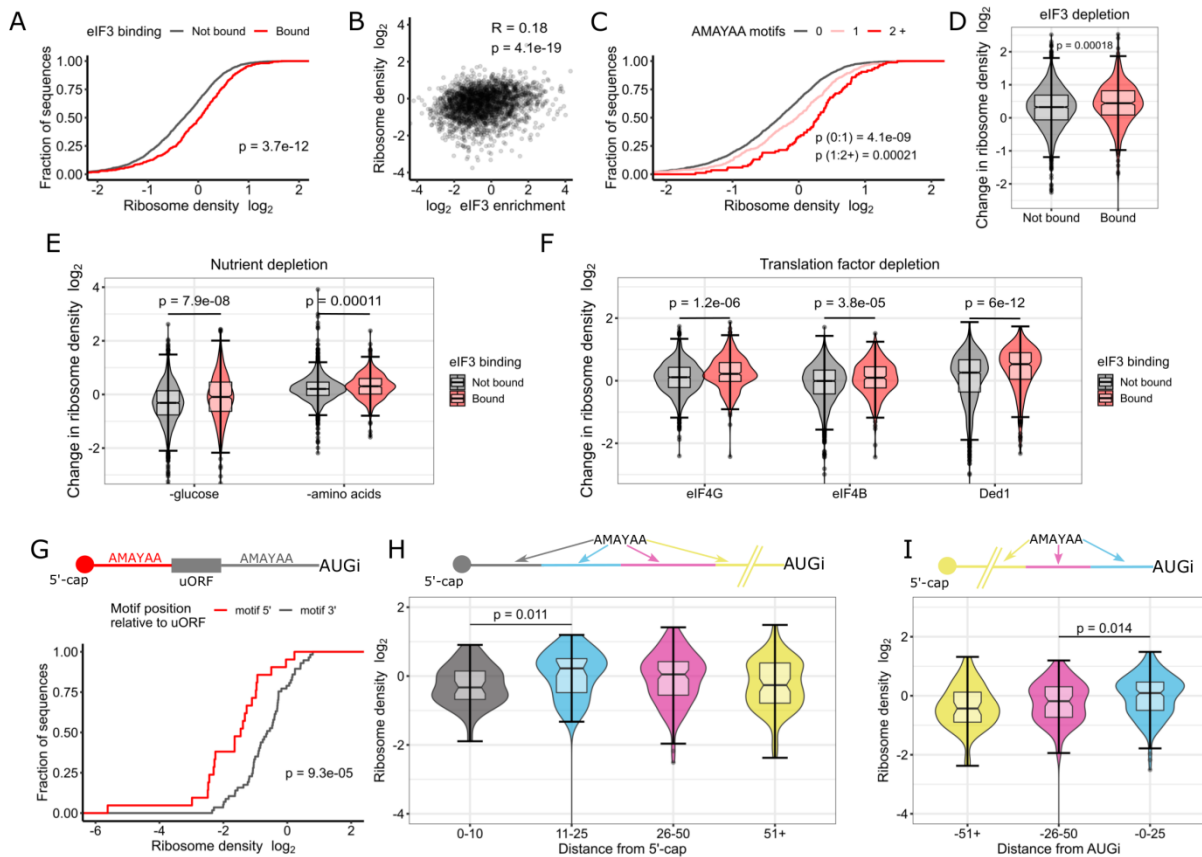

248  
 249 **Figure 4: eIF3 binding and AMAYAA motifs enhance ribosome recruitment and start**  
 250 **codon recognition in vivo.** a) mRNAs with 5'-UTRs that bound eIF3 in vitro show higher  
 251 ribosome densities in growing yeast. Cumulative distributions of ribosome densities for bound  
 252 (red) or not bound (grey) mRNAs. “Bound” includes the union of 55, 166, and 500 nM libraries.  
 253 Ribosome density equals the average number of ribosome-protected mRNA fragments per  
 254 mRNA for genes expressing a single dominant 5'-UTR isoform (see Methods). See Table II for  
 255 ribosome profiling data sources. b) eIF3 binding in vitro correlates with ribosome density in  
 256 growing yeast (Pearson). c) 5'-UTR AMAYAA motifs increase ribosome density in a dose-  
 257 dependent manner. d-f) eIF3 binding mRNAs (red) maintain higher ribosome densities than non-  
 258 binding (grey) under conditions of limiting eIF3 (d), following acute starvation for glucose or  
 259 amino acids (e), and upon inactivation of various initiation factors (f). g) mRNAs with a 5'-UTR  
 260 AMAYAA motif 5' to a uORF (red) show reduced ribosome density compared to genes with the  
 261 motif 3' (grey). mRNAs were grouped based on the position of the first AMAYAA motif relative  
 262 to the last uORF. h,i) Ribosome density varies by AMAYAA motif location for mRNAs without  
 263 uORFs. Higher ribosome densities for mRNAs with motifs located 11-25 nt from the 5' end of  
 264 the mRNA (h) or 0-25 nt upstream of the start codon (i). Bonferroni corrected Mann-Whitney p-  
 265 values shown for selected comparisons. a-i) all values of ribosome densities and changes in  
 266 ribosome densities have been log<sub>2</sub>-transformed. See also Figure S4.

267

268  
269 We then examined translation activity of eIF3-binding mRNAs under various stress  
270 conditions where alternate mechanisms of ribosome recruitment may contribute to selective  
271 translation of some genes. We found that mRNAs which are capable of direct eIF3 binding are  
272 significantly more resistant to downregulation of translation during acute glucose starvation  
273 ( $p=3.7e-8$ ) (Figure 4e) (Zid and O’Shea, 2014) and amino acid withdrawal (Figure 4e) (Santos et  
274 al., 2019). We speculate that stresses that downregulate early steps in initiation (e.g. cap-binding  
275 activity) allow selective, eIF3-dependent translation of specific mRNAs. Consistent with this  
276 possibility, eIF3-binding mRNAs maintained higher translation in cells genetically depleted of  
277 eIF4G ( $p=8.94e-6$ ) as well as in cold-sensitive mutants of factors that collaborate with eIF4G to  
278 recruit ribosomes, including Ded1 (*ded1-cs*,  $p=8.9e-13$ ) and eIF4B (*tif3-cs*,  $p=8.8e-7$ ) (Figure 4f)  
279 (Sen et al., 2015, 2016; Zinshteyn et al., 2017). These results show that eIF3-binding mRNAs  
280 display distinct patterns of translational control.

281  
282 **eIF3 binding motifs can promote or repress translation depending on their location**  
283 Our analysis of eIF3 binding in vitro and ribosome profiling in vivo is consistent with widespread  
284 translational enhancement via eIF3 binding to 5'-UTRs. However, for technical reasons, the  
285 synthetic pool used for eIF3 RBNS was limited to 5'-UTRs  $\leq 122$  nt. Focusing on the AMAYAA  
286 binding motif, we expanded our analysis to include all genes with a single dominant 5'-UTR and  
287 sufficient reads to quantify ribosome density in exponentially growing yeast. This allowed us to  
288 include an additional 536 genes, many of which contained multiple upstream open reading  
289 frames (uORFs). Intriguingly, while the AMAYAA motif was associated with enhanced  
290 translation if the longer 5'-UTR lacked uORFs, in mRNAs with multiple uORFs AMAYAA  
291 motifs were associated with translational repression of the main ORF (Figure S4g).

292  
293 We hypothesized that upstream eIF3 binding motifs enhance translation of uORFs which  
294 leads to fewer ribosomes initiating translation of the main ORF. Additionally, as ribosomes sense  
295 the 5'-UTR sequence by scanning, we hypothesized that the order of the motif and the uORF on  
296 the 5'-UTR will matter. Therefore, we examined ribosome density on 78 mRNAs that contain one  
297 uORF and one AMAYAA motif within the 5'-UTR. Genes were separated into two categories  
298 based on the relative positions of uORF and motif – motif 5' of the uORF or motif 3'. Notably,  
299 there was a 2-fold difference in ribosome density between mRNAs with the motif upstream vs.  
300 downstream of uORFs, with median ribosome densities of 0.24 and 0.55, respectively ( $p=2.7e-8$ )  
301 (Figure 4g). Therefore, it is likely that binding of eIF3 to AMAYAA motifs promotes recognition  
302 of downstream AUG codons, which can be in uORFs or the main ORF.

303  
304 eIF3 binding to AMAYAA motifs has the potential to enhance translation initiation by  
305 multiple mechanisms which include initial recruitment of 43S pre-initiation complexes as well as  
306 recognition of initiation codons ( $AUG_i$ ) during scanning. The most likely mechanism depends on  
307 the position of the AMAYAA motif relative to the cap and  $AUG_i$ . We therefore compared

308 ribosome density among groups of genes with AMAYAA motifs at varying distances from the  
309 annotated transcriptional start site (TSS) and from the AUG<sub>i</sub>, excluding genes with uAUGs.  
310 Ribosome density was highest for mRNAs where the motif is within 11-25 nt from the TSS  
311 (Figure 4h), or within 25 nt upstream of the AUG<sub>i</sub> (Figure 4i). Together, our results indicate that  
312 high-affinity binding interactions between yeast eIF3 and specific 5'-UTR sequences increase  
313 translation initiation at downstream start codons, and may do so by promoting distinct steps  
314 depending on the site of eIF3 binding (Figure 5).

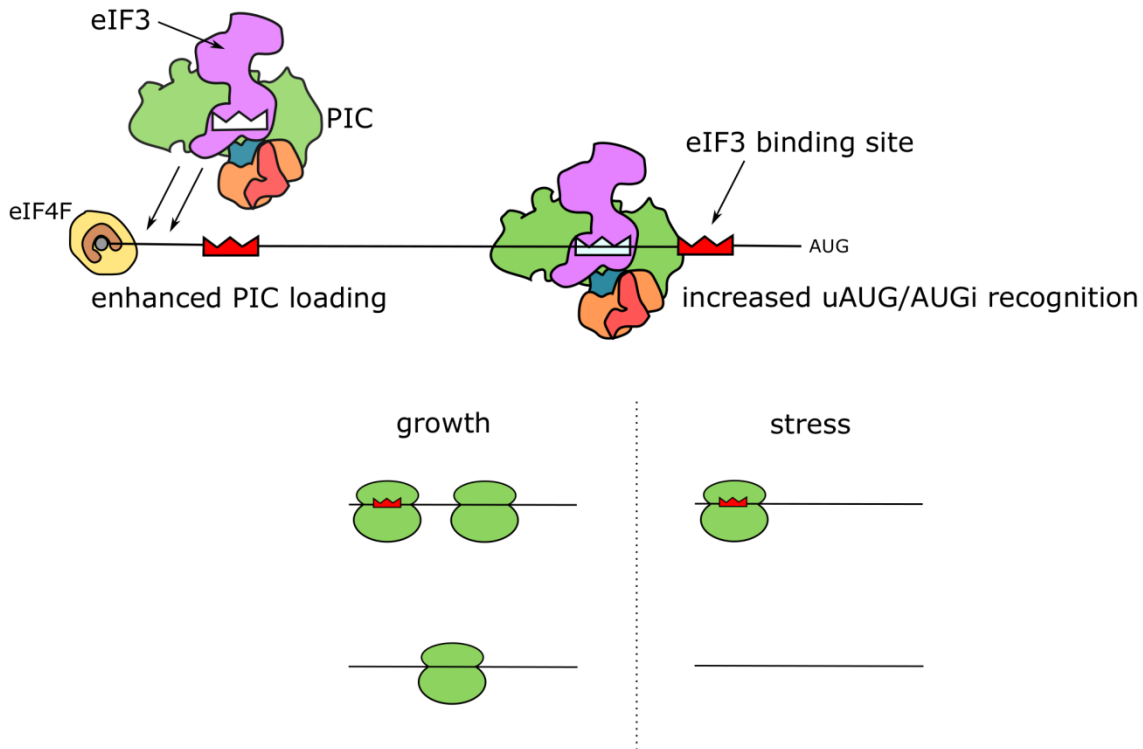

315  
316

317 **Figure 5: Model of location-dependent translational enhancement by direct binding of eIF3**  
318 **to 5'-UTR motifs.**

319  
320

## 321 Discussion

322

323 5'-UTRs are the site of action during translation initiation and are an important mRNA feature for  
324 controlling protein production post-transcriptionally in eukaryotic cells. We hypothesize that  
325 translation-enhancing elements within cellular 5'-UTRs include sequences that bind preferentially  
326 to multiple eukaryotic initiation factors (eIFs), as recently demonstrated for yeast eIF4G1  
327 (Zinshteyn et al., 2017). Here we performed an unbiased testing of purified eIF3 binding to a  
328 library of thousands of yeast 5'-UTRs to uncover hundreds of mRNAs that preferentially bind  
329 eIF3. We show that eIF3-binding mRNAs have higher translation activity in growing cells and  
330 are less sensitive to translational inhibition in response to a variety of genetic and environmental

331 perturbations that result in widespread effects on cellular translation. Together, our findings  
332 support a broad role for high-affinity interactions between cellular 5'-UTRs and core initiation  
333 factors for translational control of gene expression.

334  
335 eIF3 promotes translation initiation by multiple mechanisms which include selective  
336 ribosome recruitment to viral mRNAs that bind eIF3 with high affinity (Filbin ME et al., 2009;  
337 Valášek et al., 2017). Our results suggest a similar role for eIF3 interactions in cellular mRNA  
338 selectivity—preferential translation of certain mRNAs under conditions that limit global  
339 initiation activity or favor non-canonical pathways of ribosome recruitment. In support, yeast  
340 eIF3-binding mRNAs maintained higher ribosome densities (average number of ribosomes per  
341 mRNA) when eIF3 protein was limited by depletion in the eIF3a/b degron strain, when cap-  
342 dependent translation was inhibited by depletion of eIF4G, and when Ded1 or eIF4B were  
343 inactivated by cold-sensitive mutations (Figure 4d, f). Globally, eIF3 binding to 5'-UTRs in vitro  
344 was modestly but significantly correlated with ribosome density in rapidly growing cells (Figure  
345 4b and S4c). This result was surprising and suggests that binding to eIF4F is not the limiting  
346 factor for initiation on all mRNAs despite the fact that eIF4F is the least abundant initiation factor  
347 during exponential growth in rich media (Von der Haar and McCarthy, 2002). Previous work  
348 established a requirement for eIF3 for RPL41A mRNA association with PICs in vivo  
349 (Jivotovskaya et al., 2006). Our findings suggest that quantitative differences in eIF3 binding  
350 partially explain differences in PIC recruitment to different mRNAs in cells.

351  
352 Analysis of eIF3-binding RNAs supports the existence of at least two modes of high-  
353 affinity binding to cellular 5'-UTRs, one that is sequence-dependent and another that remains to  
354 be determined. Binding to eIF3 in vitro (Figure 3d) and ribosome density in vivo (Figure 4c)  
355 increased with increasing numbers of AMAYAA motifs within the 5'-UTR unless the motif was  
356 located upstream of a uAUG (Figure 4g). This context-dependent effect of the eIF3-binding motif  
357 on translation of the main ORF is consistent with a simple model whereby binding to eIF3  
358 promotes initiation on the closest downstream AUG. The observed optimal spacing with respect  
359 to the 5' end of the mRNA is consistent with enhanced 43S recruitment immediately downstream  
360 of the cap-proximal region bound by eIF4F (Figure 4h). In addition, translational enhancement by  
361 AMAYAA motifs close to and upstream of AUG<sub>i</sub> suggests favorable interactions with 43S-  
362 bound eIF3 during start codon recognition (Figure 4i). This spacing is consistent with crosslinks  
363 observed between conserved subunits of mammalian eIF3, a and b, and the mRNA at positions -  
364 17 to -14 relative to the start codon (Pisarev et al., 2008).

365  
366 Our results raise the question of which parts of the multi-protein eIF3 complex are  
367 responsible for high-affinity binding to specific cellular 5'-UTRs. It is likely that distinct eIF3  
368 surfaces contribute to binding in different cellular 5'-UTRs as shown for two classes of eIF3-  
369 binding viral 5'-UTRs (Neupane et al., 2020). Multiple conserved subunits of human eIF3,  
370 including a, b, d and g, crosslink directly to cellular mRNA in cultured human cells (Lee et al.,  
371 2015), highlighting the potential for distinct subunit binding preferences to contribute to mRNA

372 selection. Candidates to mediate recognition of the AMAYAA sequence include the helix–loop–  
373 helix (HLH) motifs in eIF3a and eIF3c and the RNA recognition motif (RRM) in eIF3b. eIF3g,  
374 which also contains an RRM, appears to be dispensable for the preferential translation of many  
375 eIF3-binding mRNAs in vivo based on the observation that eIF3-binding mRNAs maintain high  
376 ribosome density in *tif34DDKK* mutants (Figure S4f) in which eIF3g and eIF3i are destabilized  
377 from the core complex of eIF3a/b/c (Herrmannová et al., 2012). Our results also suggest the  
378 potential for mRNA-specific translational regulation by post-translational modifications to  
379 specific domains within eIF3, such as succinylation of the RRM in eIF3b or phosphorylation of  
380 the RRM in eIF3g (Albuquerque et al., 2008; Weinert et al., 2013).

381  
382 The comprehensive approach used here to identify cellular 5'-UTRs that bind to wild-type  
383 yeast eIF3 can be used to tease out the contributions of individual domains, and even specific  
384 amino acids of interest. It is increasingly clear that core initiation factors engage cellular 5'-UTRs  
385 in highly specific interactions that contribute to mRNA-specific rates of initiation—in growing  
386 cells and global re-tuning of translation during stress. Our results suggest a broad potential for  
387 direct eIF3 binding to maintain translation of specific cellular mRNAs during a variety of stress  
388 responses. Such mRNA-specific sensitivities are likely to be important for the pathological  
389 effects of dysregulated initiation factors in cancer and other human diseases.

390

391

## 392 **Acknowledgements**

393

394 We thank Alan Hinnebusch and Jon Lorsch for the eIF3 production strain and eIF3 purification  
395 protocols. We thank members of the Gilbert lab for discussion and comments on the manuscript.  
396 This work was supported by NIH R01GM132358 to W. Gilbert and R15GM140372 to C. Aitken.  
397 R. Niederer was supported by the American Cancer Society (Postdoctoral Fellow) and the NIH  
398 (K99GM135533).

399

## 400 **Competing interests**

401 The authors declare no competing interests.

402

403

404

405 **Supplemental Figures**

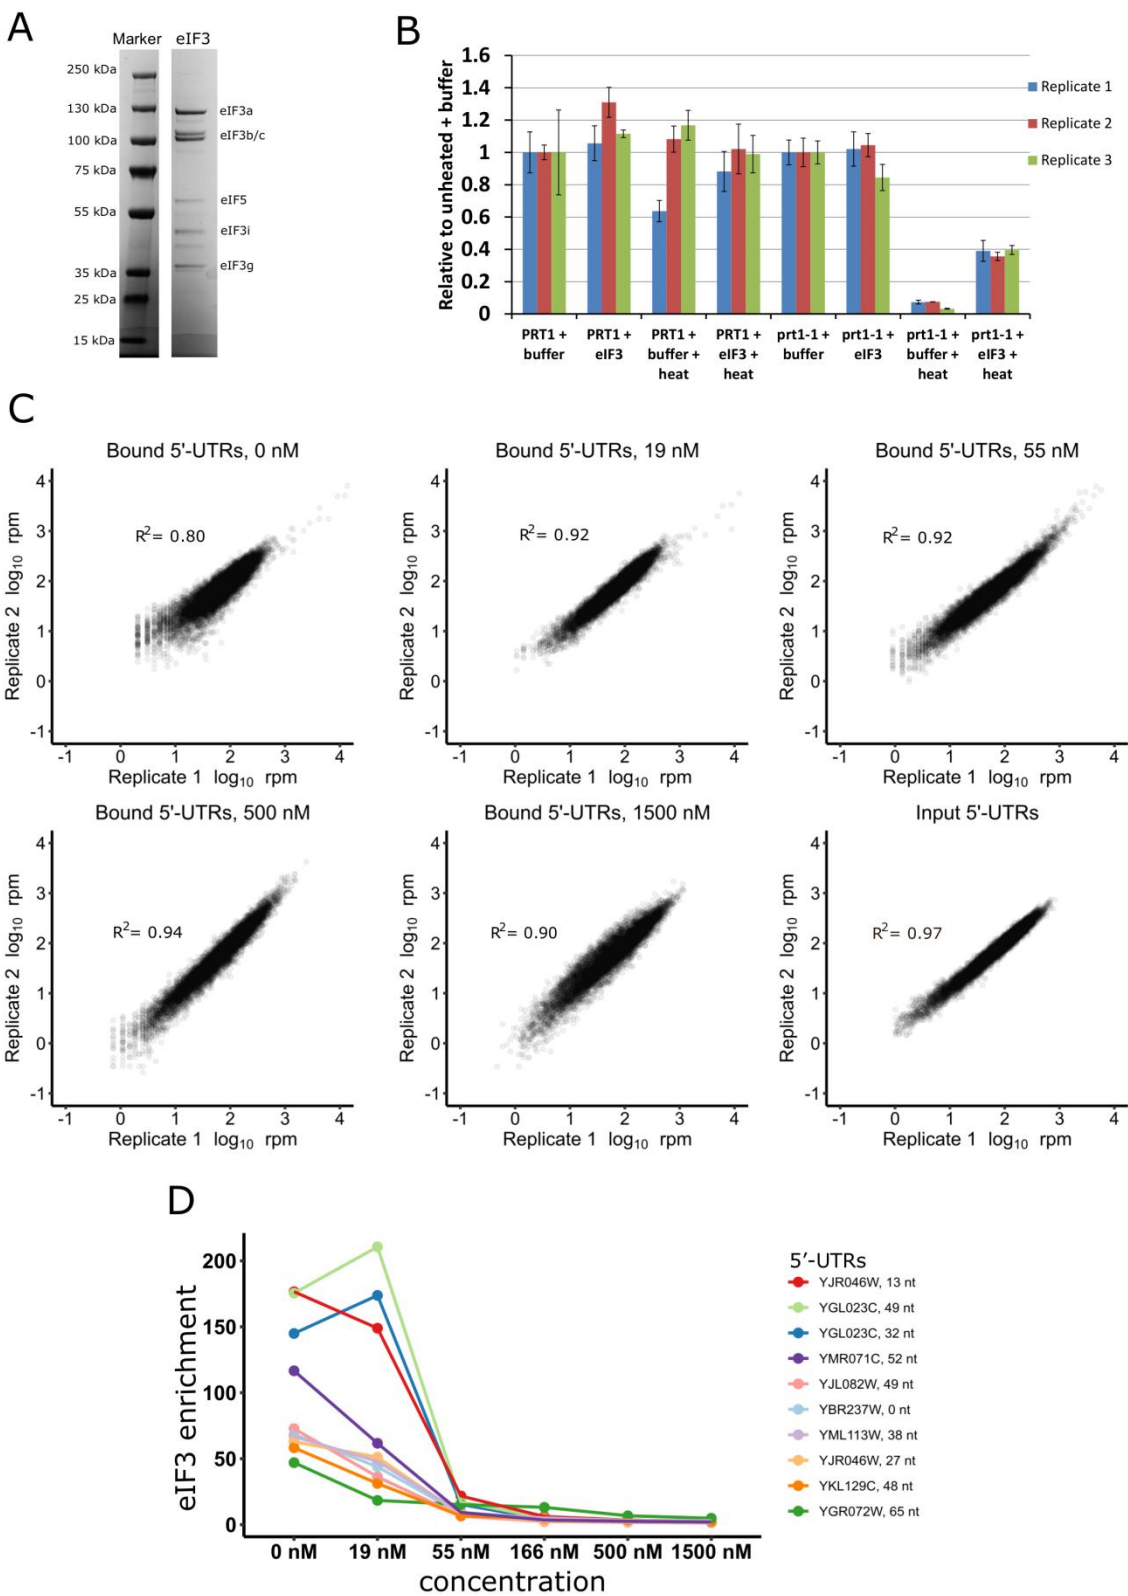



407 **Figure S1: Control experiments for eIF3 RNA Bind-n-Seq** **a)** Commassie blue-stained tris-  
408 glycine gel of purified eIF3 with indicated subunits. The major contaminant observed is eIF5. **b)**  
409 Purified eIF3 restores translational activity to heat-inactivated extracts from *prt1-1* mutant yeast.  
410 Reported are the relative luciferase activities of eIF3 heat sensitive (*prt1-1*) and isogenic (*PRT1*)  
411 yeast extracts supplemented with either 100 nM purified eIF3 in storage buffer (+eIF3) or equal  
412 volume of storage buffer (+Buffer). Replicates indicate independently prepared extracts. Bars  
413 represent the average of 3 technical replicates and error bars represent standard deviation. **c)**  
414 RBNS is reproducible for all libraries. Shown are the bound reads for libraries at 0, 19, 55, 500,  
415 and 1500 nM eIF3, as well as the reads for the input libraries. **d)** Enrichment of top 10 binders in  
416 0 nM libraries traced across all libraries. The gradual decrease in eIF3 enrichment score with  
417 increased eIF3 concentration is consistent with constant background binding with increasing  
418 amount of specifically bound RNA (Lambert et al., 2014).  
419

420

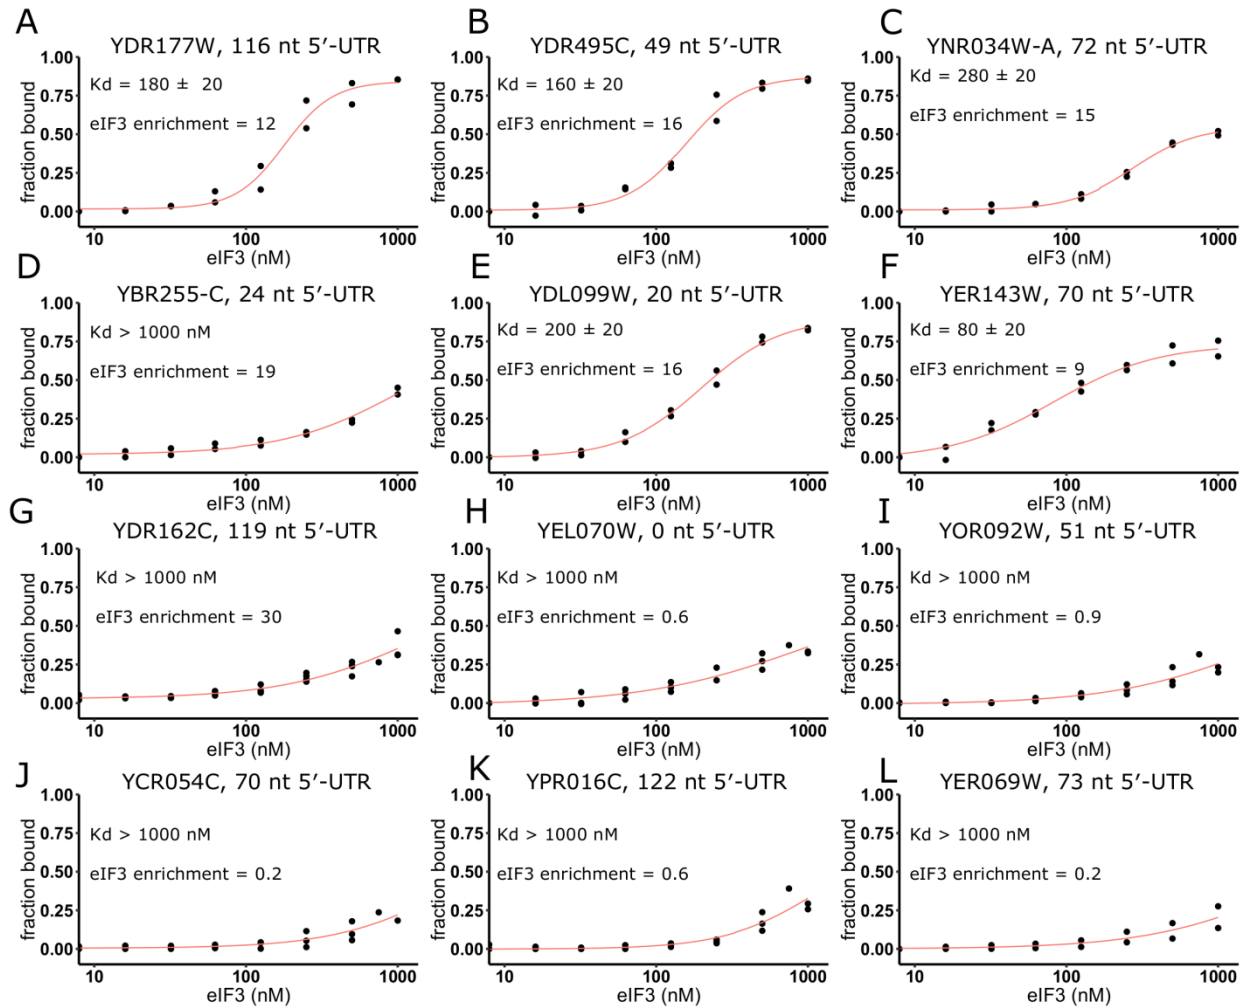

421

422 **Figure S2: eIF3 enrichment score is predictive of eIF3 binding affinity.** Increasing amounts  
 423 of eIF3 were bound with <sup>32</sup>P-labeled 5'-UTRs from (a) *YDR177W*, (b) *YDR495C*, (c)  
 424 *YNR034W-A*, (d) *YBR255C-A*, (e) *YDL099W*, (f) *YER143W*, (g) *YDR162C*, (h) *YEL070W*, (i)  
 425 *YOR092W*, (j) *YCR054C*, (k) *YPR016C* or (l) *YER069W*. 5'-UTRs in (a-g) represent binders in  
 426 the RBNS assay (eIF3 enrichment > 1.59) and (h-l) represent non-binders. Apparent dissociation  
 427 constant calculated from non-linear regression using Hill's equation in Origin is indicated  
 428 together with the obtained eIF3 enrichment score.

429

430

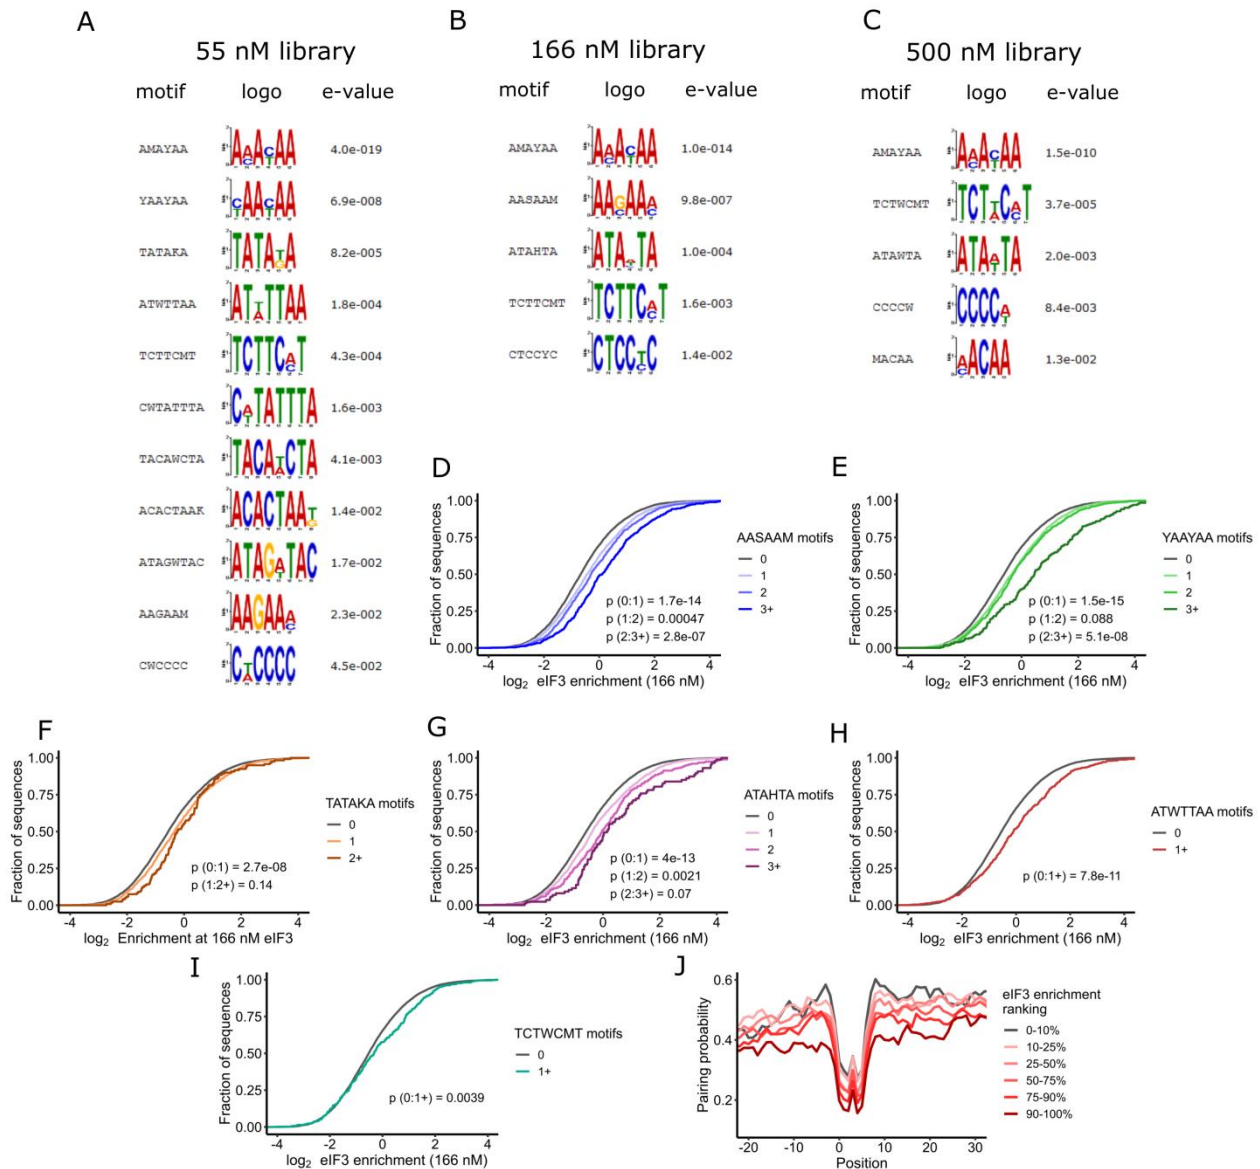

431

432 **Figure S3: eIF3 preferentially recognizes AMAYAA motifs in unstructured regions.**

433 Sequence motifs identified by DREME (Bailey et al., 2015) in (a) 55 nM, (b) 166 nM or (c) 500

434 nM as overrepresented among bound 5'-UTRs. E-value represent Fisher's exact test p-value for a

435 given motif multiplied by number of motifs tested. Only motifs with e-value < 0.05 are shown.

436 Distribution of observed enrichment in 166 nM library is shown for motifs (d) ASSAAM, (e)

437 YAAYAA, (f) TATAKA, (g) ATAHTA, (h) ATWTTAA, or (i) TCTWCMT. (j) Higher eIF3

438 enrichment scores for 5'-UTRs containing AMAYAA motif are associated with lower RNA base-

439 pairing probabilities of the motif and neighboring nucleotides.

440

441

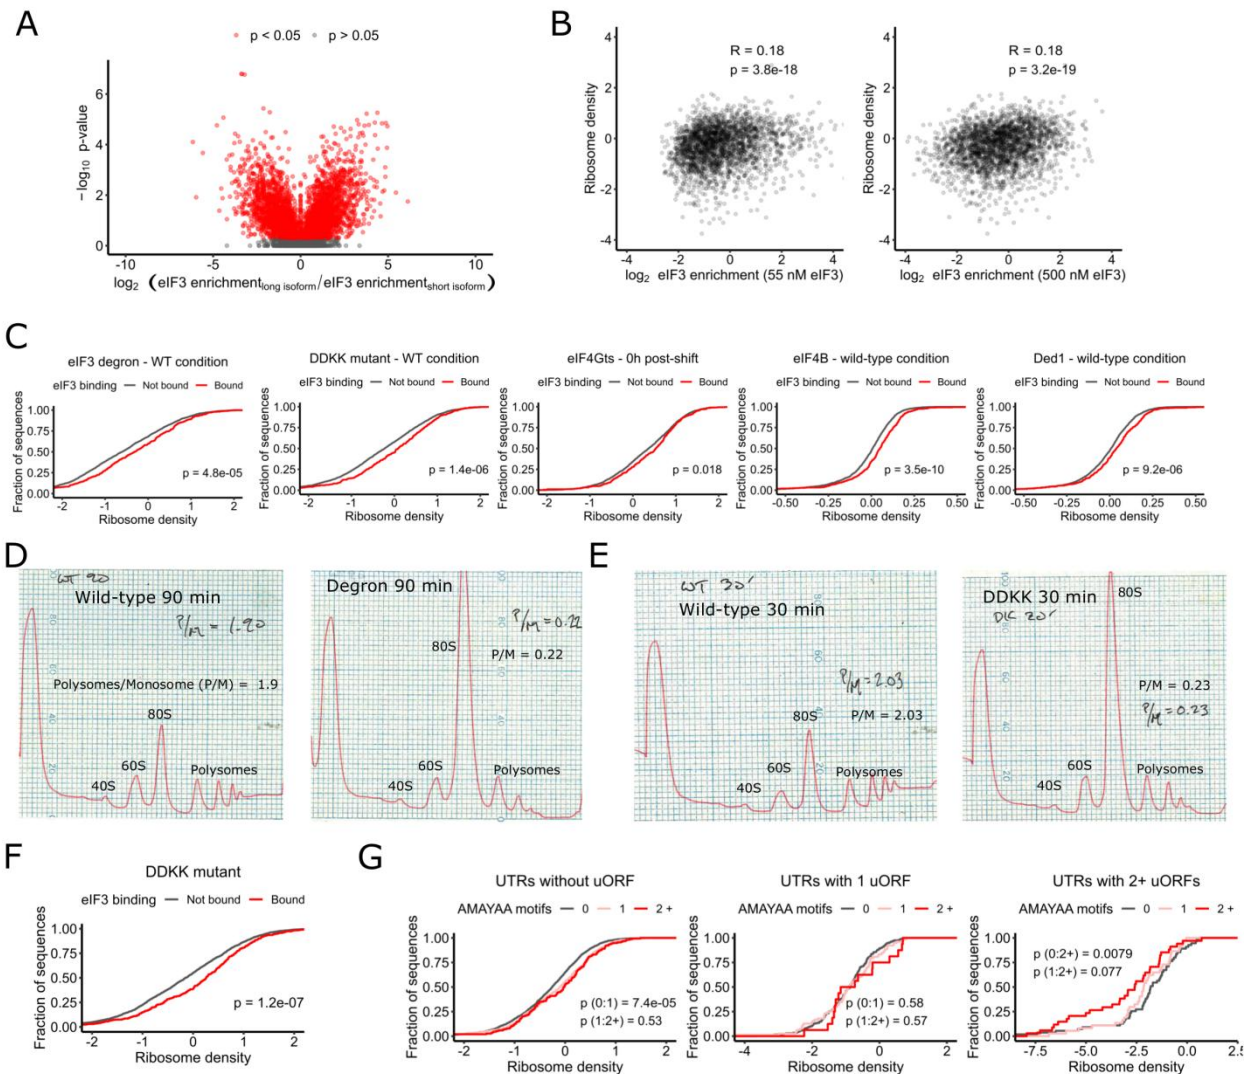

442

443

444

445

446

447

448

449

450

451

452

453

454

**Figure S4: eIF3 binding and AMAYAA motifs enhance ribosome recruitment in vivo** a) 5'-UTR isoforms from hundreds of genes show differential binding to eIF3. Differential eIF3 enrichment for short and long isoform is plotted together with Bonferroni corrected p-values (t-test). Significant differences  $p_{\text{adj}} < 0.05$  are depicted in red. b) eIF3 enrichment in 55 and 500 nM libraries is correlated with ribosome densities. eIF3 binding is associated with increased ribosomal densities across multiple datasets in (c) wild type or pseudo-wild type and in (f) eIF3 DDKK mutant cells. eIF3 depletion leads to > 80 % decrease in translation in (d) eIF3 degron or (e) DDKK mutant cells as estimated from the change of polysome/monosome (P/M) ratio. (g) The AMAYAA motif is associated with increased ribosome density in 5'-UTRs without uORFs. In 5'-UTRs with multiple uORFs, the AMAYAA motif is associated with decreased ribosome density. b, c, f, g) Depicted are the  $\log_2$ -transformed values of ribosome densities.

455

## 456 **Material and methods**

457

### 458 **Yeast strains and growth**

459 Genotypes are listed in Table I. Strain LPY87 was grown for eIF3 purification as previously  
460 described (Phan et al., 2001). Briefly, culture was grown overnight in synthetic complete (SC)  
461 media without leucine and uracil at 30°C. The starter culture was used to inoculate 18 L of YPD  
462 media and grown for 14 – 18 hours to OD<sub>600</sub> 4 – 5. Wild type (*PRT1*) and eIF3 temperature-  
463 sensitive (*prt1-1*) strains used to prepare extracts for in vitro translation and complementation  
464 assays were grown at 23 °C in YPD. The *eIF3a/b* degron strain YAJ34 (Jivotovskaya et al., 2006)  
465 was grown at 25 °C in SC<sub>Raff</sub> + Cu<sup>2+</sup> before being shifted to pre-warmed SC<sub>Raff/Gal</sub> + BCS at 36 °C  
466 for 90 min to deplete eIF3a/b. The temperature-sensitive *tif34-DDKK* strain (Herrmannová et al.,  
467 2012) was grown at 30°C in SC media before being shifted to pre-warmed SC media at 37 °C for  
468 30 min.

469

### 470 **eIF3 purification**

471 LPY87 cells expressing His-tagged eIF3 were harvested (85-95 g of wet cell pellet), washed with  
472 lysis buffer (20 mM HEPES.KOH, 350 mM KCl, 5 mM MgCl<sub>2</sub>, 10 % Glycerol, 20 mM  
473 Imidazole, 10 mM Beta-mercaptoethanol, pH = 7.4), resuspended in 30 mL of lysis buffer, frozen  
474 as droplets in liquid N<sub>2</sub> and stored in -80°C until lysis on Retch cryomill, using 2 × 5 min  
475 shaking at 15 Hz with 1 min intermittent cooling at 5 Hz. Cell powder was thawed in 400 mL of  
476 lysis buffer in the presence of cOmplete protease inhibitors (Sigma-Aldrich), 1 µg/ml pepstatin A,  
477 1 µg/ml aprotinin, 1 µg/ml leupeptin, and 100 µL of Turbo DNase. Lysate was clarified at 12,500  
478 × g for 40 min and applied to 5 mL of freshly regenerated Ni 2+ Sepharose. Bound protein was  
479 washed with lysis buffer until there was no detectable protein in the flow through and eluted  
480 using lysis buffer supplemented with 350 mM Imidazole. Fractions containing eIF3 were  
481 concentrated with 10 kDa MWCO centrifugation columns to ~ 2 mL and resolved in two batches  
482 on HiLoad 16/60 Superdex 200 preequilibrated in low salt buffer 20 mM HEPES.KOH, 100 mM  
483 KCl, 10 % glycerol, 0.1 mM EDTA, 2 mM DTT, pH = 7.4. Fractions containing all 5 eIF3  
484 subunits were combined and loaded on phosphocellulose column prepared from cellulose  
485 phosphate (Sigma-Aldrich) sequentially activated in 1M HCl, 1 M NaOH and preequilibrated in  
486 low salt buffer. The column was then washed with 100 mL of low salt buffer and the protein was  
487 sequentially eluted with 200/350/1000 mM KCl in 20 mM HEPES.KOH, 10 % glycerol, 0.1 mM  
488 EDTA, 2 mM DTT, pH = 7.4. eIF3-containing fractions were pooled dialyzed against 2 L of  
489 storage buffer (20 mM HEPES.KOH, 100 mM KOAc, 10 % Glycerol, 2 mM DTT, pH = 7.4),  
490 concentrated to 0.5 – 1 mL and stored in 15 µL aliquots in -80°C. Final eIF3 concentration was  
491 determined using Bradford assay with BSA as the protein standard.

492

### 493 **eIF3 complementation assay**

494 Translationally active extracts were prepared from wild type (*PRT1*) and heat sensitive eIF3  
495 mutant (*prt1-1*) strains grown at 23 °C using published protocols (Zinshteyn et al., 2017). Three

496 replicate extracts prepared from independent cultures were either pre-treated at 39 °C for 10  
497 minutes or kept on ice. Translation of capped nanoluciferase reporter mRNA was performed with  
498 supplemental 100 nM eIF3 or buffer control in three technical replicates as described previously  
499 (Rojas-Duran and Gilbert, 2012). The reaction was stopped after 30 minutes by 100-fold dilution  
500 into PBS and the amount of nanoluciferase was measured using Nano-Glo (Promega) on a Centro  
501 XS3 luminometer (Berthold).

502

### 503 **5'-UTR pool design and synthesis**

504 5'-UTR boundaries and abundances were calculated from sequencing of wild type yeast  
505 (Pelechano et al. 2014). When a 5'-UTR started within 10 nts of its nearest neighbor, the  
506 sequences were merged. Inclusion in the pool also required the following: 5'-UTRs must be  
507 expressed within 25% of the mode abundance for a given 5' UTR, and 5'-UTRs must make up at  
508 least 5% of the total abundance for that ORF, unless the mode was <5% of the total, in which  
509 case we used the mode. Upstream AUGs within 761 (6.3% of all) 5'-UTR sequences were  
510 mutated to AGT such that the first AUG encountered by a scanning pre-initiation complex  
511 moving 5' to 3' would be the annotated AUGi. Each sequence consisted of a randomized 10  
512 nucleotide unique identifier barcode and an adaptor sequence used for priming reverse  
513 transcription and Illumina sequencing. RNA was *in vitro* transcribed from the PCR-amplified  
514 pool using in house prepared T7 RNA polymerase and gel-purified.

515

### 516 **RBNS library preparation**

517 Binding reactions (50 µL) were assembled at room temperature with 60 ng/µL of pool RNA (~1  
518 µM) and various concentrations of eIF3 (0-1500 nM, 2 replicates each) in 20 mM HEPES. KOH,  
519 100 mM KOAc, 2 mM Mg(OAc)<sub>2</sub>, 10 % glycerol, 2 mM DTT, RNaseIn (80 U, Promega), and  
520 100 ng/µL of yeast tRNA (~4 µM, Sigma-Aldrich). After 30 minutes, the reaction was passed  
521 through layered nitrocellulose (top) and nylon (bottom) filters preequilibrated in binding buffer  
522 using a vacuum manifold. Filters were washed 2 × 200 µL with ice-cold binding buffer and dried.  
523 eIF3-bound RNA was extracted from nitrocellulose by incubation with proteinase K (Sigma-  
524 Aldrich), concentrated by Zymo column, and reverse transcribed with AMV reverse transcriptase  
525 (RT primer: OWG921). Gel-purified cDNA was ligated with a barcoded (10N) 5'-adaptor as  
526 described (Niederer et al., 2020).

527

### 528 **Ribosome profiling of eIF3a/b degron and eIF3i-DDKK**

529 Each strain and its matching wild type (Table I) were grown under restrictive conditions (see  
530 Yeast strains and growth) for a duration resulting in ~80% decrease in bulk translation as judged  
531 by analytical polysome profiling and quantification of polysome:monosome ratios as previously  
532 described (Jivotovskaya et al., 2006) Cycloheximide was added to a final concentration of 100  
533 µg/mL 2 min prior to harvesting by filtration through a Kontes filtration apparatus and flash  
534 freezing in liquid nitrogen. We performed all subsequent steps as described previously (Sen et al.,  
535 2016).

536

537 **Data analysis**

538 RBNS raw sequencing reads were trimmed with cutadapt and aligned to the pool sequences. PCR  
539 duplicates in each library were removed using 10N barcodes in the 5'-adapter and reads were  
540 normalized in each library according to their sequencing depth. Artificial sequences designed for  
541 other studies were excluded from the data processing and analysis (Niederer et al., 2020). For  
542 quantification, we required >1 rpm in each of the input replicates and >2 reads in each of the  
543 sample libraries. Enrichment score for each 5'-UTR in a given library was then calculated as the  
544 ratio of normalized reads in the library to input. Data was processed and visualized in Python and  
545 R using custom scripts.

546  
547 For comparisons between translation activity in vivo and eIF3 binding in vitro, in vivo 5'-UTRs  
548 were defined based on sequencing reads (Pelechano et al., 2014). For every ORF, 5'-UTRs within  
549 10 nts of one another were merged. Only 5'-UTRs that contributed at least 5% to the total mRNA  
550 pool for a given gene were considered. Dominant 5'-UTRs were defined as the most abundant 5'-  
551 UTR for a given gene, which must account for at least 40 % of all mRNAs for that gene and be at  
552 least twice as abundant as the second most common 5'-UTR. The presence of an upstream AUG  
553 was the selection criteria for assigning uORFs to a given 5'-UTR. For the motif positional  
554 comparisons, only 5'-UTRs with sizes between 40 and 150 nucleotides were selected.

555  
556 **Filter binding**  
557 Individual 5'-UTRs were amplified from the pool using target-specific primers and in vitro  
558 transcribed. Gel-purified RNA was dephosphorylated (FastAP, ThermoFisher) and 5'-labeled  
559 with 32P- $\gamma$ -ATP (Perkin Elmer) using T4 Polynucleotide kinase (NEB). Binding reactions (5  $\mu$ L)  
560 contained ~10 nM labeled RNA and 0/16/32/63/125/250/500/1000 nM eIF3 in buffer as  
561 described for RBNS. After 30 minutes, reactions were passed through layered nitrocellulose (top)  
562 and nylon (bottom) filters preequilibrated in binding buffer. Filters were washed with 80  $\mu$ L of  
563 ice-cold binding buffer, disassembled and dried. Captured RNA was visualized by  
564 phosphorimaging and quantified using ImageJ (Schneider et al., 2012). At each concentration,  
565 eIF3-bound RNA was quantified as the ratio of nitrocellulose-bound RNA to the sum of RNA  
566 captured on both filters. Data were fit using nonlinear regression with Hill's equation in Origin.

567  
568

569 Table I: Yeast strains

570

| Strain            | Genotype                                                                                                                                                                                     | Reference (doi)               |
|-------------------|----------------------------------------------------------------------------------------------------------------------------------------------------------------------------------------------|-------------------------------|
| LPY87             | <i>MATa/α ura3-52/ura3-52 trp1/trp1 leu2-Δ1/leu2-Δ1 his3-Δ200/his3-Δ200 pep::HIS4/pep::HIS4 prb1-Δ1.6/prb1-Δ1.6 can1/can1 GAL<sup>+</sup> pLPY-PRT1His-TIF34HA-TIF35Flag/pLPY-TIF32-NIP1</i> | 10.1093/emboj/20.11.2954      |
| <i>PRT1</i>       | <i>MATa leu2-3,112 ura3-52 ade1 MEL1</i>                                                                                                                                                     | 10.1016/s0021-9258(18)61583-2 |
| <i>prt1-1</i>     | <i>MATa prt1-1 leu2-3,112 ura3-52 ade1</i>                                                                                                                                                   | 10.1016/s0021-9258(18)61583-2 |
| <i>TIF34</i>      | <i>MATa leu2-3,-112 ura3-52::GCN2 trp1Δ tif34Δ YEp-TIF34-URA3</i>                                                                                                                            | 10.1093/nar/gkr765            |
| <i>tif34-DDKK</i> | <i>MATa leu2-3,-112 ura3-52::GCN2 trp1Δ tif34Δ YCp-i/TIF34-D207K-D224K-HA-TRP1</i>                                                                                                           | 10.1093/nar/gkr765            |

571

572



573

574 Table II: Datasets

| Name                                                                                                                                       | Authors                                                              | Description                                    | GEO accession number | Year |
|--------------------------------------------------------------------------------------------------------------------------------------------|----------------------------------------------------------------------|------------------------------------------------|----------------------|------|
| Promoter sequences direct cytoplasmic localization and translation of mRNAs during starvation in yeast.                                    | Zid BM, O'Shea EK                                                    | ribosome profiling of glucose-starved yeast    | GSE56622             | 2014 |
| Genome-wide analysis of translational efficiency reveals distinct but overlapping functions of yeast DEAD-box RNA helicases Ded1 and eIF4A | Sen ND, Zhou F, Ingolia NT, Hinnebusch AG                            | ribosome profiling of Ded1-depleted yeast      | GSE66411             | 2015 |
| Improved Ribosome-Footprint and mRNA Measurements Provide Insights into Dynamics and Regulation of Yeast Translation                       | Weinberg DE, Shah P, Eichhorn SW, Hussmann JA, Plotkin JB, Bartel DP | ribosome profiling of wild-type yeast          | GSE75897             | 2016 |
| eIF4B stimulates translation of long mRNAs with structured 5' UTRs and low closed-loop potential but weak dependence on eIF4G              | Sen ND, Zhou F, Harris M, Ingolia NT, Hinnebusch AG                  | ribosome profiling of eIF4B-depleted yeast     | GSE81966             | 2016 |
| Translation initiation factor eIF4G1 preferentially binds yeast transcript leaders containing conserved oligo-uridine motifs               | Zinshteyn B, Rojas-Duran MF, Gilbert WV                              | ribosome profiling of eIF4G-depleted yeast     | GSE87614             | 2017 |
| Cycloheximide can distort measurements of mRNA levels and translation efficiency                                                           | Santos DA, Shi L, Tu BP, Weissman JS                                 | ribosome profiling of amino acid-starved yeast | GSE125038            | 2019 |

575

576

577

## 578 **References Cited**

579

580 Aitken, C.E., Beznosková, P., Vlčková, V., Chiu, W.-L., Zhou, F., Valášek, L.S., Hinnebusch,  
581 A.G., and Lorsch, J.R. (2016). Eukaryotic translation initiation factor 3 plays distinct roles at the  
582 mRNA entry and exit channels of the ribosomal preinitiation complex. *Elife* 5.

583

584 Albuquerque, C.P., Smolka, M.B., Payne, S.H., Bafna, V., Eng, J., and Zhou, H. (2008). A  
585 multidimensional chromatography technology for in-depth phosphoproteome analysis. *Mol. Cell.*  
586 *Proteomics* 7, 1389–1396.

587

588 Bailey, T.L., Johnson, J., Grant, C.E., and Noble, W.S. (2015). The MEME Suite. *Nucleic Acids*  
589 *Res.* 43, W39–W49.

590

591 Cate, J.H.D. (2017). Human eIF3: from “blobology” to biological insight. *Philos. Trans. R. Soc.*  
592 *Lond. B. Biol. Sci.* 372, 20160176.

593

594 Dever, T.E., Kinzy, T.G., and Pavitt, G.D. (2016). Mechanism and Regulation of Protein  
595 Synthesis in *Saccharomyces cerevisiae*. *Genetics* 203, 65–107.

596

597 Filbin ME, Kieft JS, Filbin, M.E., and Kieft, J.S. (2009). Toward a structural understanding of  
598 IRES RNA function. *Curr. Opin. Struct. Biol.* 19, 267–276.

599

600 Ghazalpour, A., Bennett, B., Petyuk, V.A., Orozco, L., Hagopian, R., Mungrue, I.N., Farber, C.R.,  
601 Sinsheimer, J., Kang, H.M., Furlotte, N., et al. (2011). Comparative analysis of proteome and  
602 transcriptome variation in mouse. *PLoS Genet.* 7.

603

604 Gilbert, W. V. (2010). Alternative ways to think about cellular internal ribosome entry. *J. Biol.*  
605 *Chem.* 285, 29033–29038.

606

607 Von der Haar, T., and McCarthy, J.E.G. (2002). Intracellular translation initiation factor levels in  
608 *Saccharomyces cerevisiae* and their role in cap-complex function. *Mol. Microbiol.* 46, 531–544.

609

610 Herrmannová, A., Daujotyte, D., Yang, J.C., Cuchalová, L., Gorrec, F., Wagner, S., Dányi, I.,  
611 Lukavsky, P.J., and Valášek, L.S. (2012). Structural analysis of an eIF3 subcomplex reveals  
612 conserved interactions required for a stable and proper translation pre-initiation complex  
613 assembly. *Nucleic Acids Res.* 40, 2294–2311.

614

615 Hinnebusch, A.G., Ivanov, I.P., and Sonenberg, N. (2016). Translational control by 5'-  
616 untranslated regions of eukaryotic mRNAs. *Science* (80-. ). 352, 1413–1416.

617

618 Jivotovskaya, A. V, Valásek, L., Hinnebusch, A.G., and Nielsen, K.H. (2006). Eukaryotic  
619 translation initiation factor 3 (eIF3) and eIF2 can promote mRNA binding to 40S subunits  
620 independently of eIF4G in yeast. *Mol. Cell. Biol.* 26, 1355–1372.  
621

622 Lahtvee, P.-J., Sánchez, B.J., Smialowska, A., Kasvandik, S., Elseman, I.E., Gatto, F., and  
623 Nielsen, J. (2017). Absolute Quantification of Protein and mRNA Abundances Demonstrate  
624 Variability in Gene-Specific Translation Efficiency in Yeast. *Cell Syst.* 4, 495-504.e5.  
625

626 Lambert, N., Robertson, A., Jangi, M., McGeary, S., Sharp, P.A., and Burge, C.B. (2014). RNA  
627 Bind-n-Seq: Quantitative Assessment of the Sequence and Structural Binding Specificity of RNA  
628 Binding Proteins. *Mol. Cell* 54, 887–900.  
629

630 Lee, A.S.Y., Kranzusch, P.J., and Cate, J.H.D. (2015). eIF3 targets cell-proliferation messenger  
631 RNAs for translational activation or repression. *Nature* 522, 111–114.  
632

633 Mitchell, S.F., Walker, S.E., Algire, M. a., Park, E.-H.H., Hinnebusch, A.G., and Lorsch, J.R.  
634 (2010). The 5'-7-methylguanosine cap on eukaryotic mRNAs serves both to stimulate canonical  
635 translation initiation and to block an alternative pathway. *Mol. Cell* 39, 950–962.  
636

637 Neupane, R., Pisareva, V.P., Rodriguez, C.F., Pisarev, A. V, and Fernández, I.S. (2020). A  
638 complex IRES at the 5'-UTR of a viral mRNA assembles a functional 48S complex via an uAUG  
639 intermediate. *Elife* 9.  
640

641 Niederer, R.O., Rojas-Duran, M.F., Zinshteyn, B., and Gilbert, W. V. (2020). Direct analysis of  
642 ribosome targeting illuminates thousand-fold regulation of translation initiation. *BioRxiv*  
643 2020.04.28.066068.  
644

645 Pelechano, V., Wei, W., Jakob, P., and Steinmetz, L.M. (2014). Genome-wide identification of  
646 transcript start and end sites by transcript isoform sequencing. *Nat. Protoc.* 9, 1740–1759.  
647

648 Phan, L., Zhang, X., Asano, K., Anderson, J., Vornlocher, H.-P., Greenberg, J.R., Qin, J., and  
649 Hinnebusch, A.G. (1998). Identification of a Translation Initiation Factor 3 (eIF3) Core Complex,  
650 Conserved in Yeast and Mammals, That Interacts with eIF5. *Mol. Cell. Biol.* 18, 4935–4946.  
651

652 Phan, L., Schoenfeld, L.W., Valásek, L., Nielsen, K.H., and Hinnebusch, A.G. (2001). A  
653 subcomplex of three eIF3 subunits binds eIF1 and eIF5 and stimulates ribosome binding of  
654 mRNA and tRNA<sup>iMet</sup>. *EMBO J.* 20, 2954–2965.  
655

656 Pisarev, A. V, Kolupaeva, V.G., Yusupov, M.M., Hellen, C.U.T., and Pestova, T. V (2008).  
657 Ribosomal position and contacts of mRNA in eukaryotic translation initiation complexes. *EMBO*  
658 *J.* 27, 1609–1621.

659  
660 Rojas-Duran, M.F., and Gilbert, W. V (2012). Alternative transcription start site selection leads  
661 to large differences in translation activity in yeast. *RNA* 18, 2299–2305.  
662  
663 Santos, D.A., Shi, L., Tu, B.P., and Weissman, J.S. (2019). Cycloheximide can distort  
664 measurements of mRNA levels and translation efficiency. *Nucleic Acids Res.* 47, 4974–4985.  
665  
666 Schneider, C.A., Rasband, W.S., and Eliceiri, K.W. (2012). NIH Image to ImageJ: 25 years of  
667 image analysis. *Nat. Methods* 9, 671–675.  
668  
669 Schuetz, A., Murakawa, Y., Rosenbaum, E., Landthaler, M., and Heinemann, U. (2014). Roquin  
670 binding to target mRNAs involves a winged helix-turn-helix motif. *Nat. Commun.* 5, 5701.  
671  
672 Schwanhäusser, B., Busse, D., Li, N., Dittmar, G., Schuchhardt, J., Wolf, J., Chen, W., Selbach,  
673 M., Schwanhauser, B., Busse, D., et al. (2011). Global quantification of mammalian gene  
674 expression control. *Nature* 473, 337–342.  
675  
676 Sen, N.D., Zhou, F., Ingolia, N.T., and Hinnebusch, A.G. (2015). Genome-wide analysis of  
677 translational efficiency reveals distinct but overlapping functions of yeast DEAD-box RNA  
678 helicases Ded1 and eIF4A. *Genome Res.* 25.  
679  
680 Sen, N.D., Zhou, F., Harris, M.S., Ingolia, N.T., and Hinnebusch, A.G. (2016). eIF4B stimulates  
681 translation of long mRNAs with structured 5' UTRs and low closed-loop potential but weak  
682 dependence on eIF4G. *Proc. Natl. Acad. Sci. U. S. A.* 113, 10464–10472.  
683  
684 Shah, P., Ding, Y., Niemczyk, M., Kudla, G., and Plotkin, J.B.J.B. (2013). Rate-limiting steps in  
685 yeast protein translation. *Cell* 153, 1589–1601.  
686  
687 Shatsky, I.N., Terenin, I.M., Smirnova, V. V., and Andreev, D.E. (2018). Cap-Independent  
688 Translation: What's in a Name? *Trends Biochem. Sci.* 43, 882–895.  
689  
690 Sun, C., Querol-Audí, J., Mortimer, S.A., Arias-Palomo, E., Doudna, J.A., Nogales, E., and Cate,  
691 J.H.D. (2013). Two RNA-binding motifs in eIF3 direct HCV IRES-dependent translation.  
692 *Nucleic Acids Res.* 41, 7512–7521.  
693  
694 Taliaferro, J.M., Lambert, N.J., Sudmant, P.H., Dominguez, D., Merkin, J.J., Alexis, M.S., Bazile,  
695 C., and Burge, C.B. (2016). RNA Sequence Context Effects Measured In Vitro Predict In Vivo  
696 Protein Binding and Regulation. *Mol. Cell* 64, 294–306.  
697  
698 Valášek, L.S., Zeman, J., Wagner, S., Beznosková, P., Pavlíková, Z., Mohammad, M.P., Hronová,  
699 V., Herrmannová, A., Hashem, Y., and Gunišová, S. (2017). Embraced by eIF3: structural and

700 functional insights into the roles of eIF3 across the translation cycle. *Nucleic Acids Res.* *45*,  
701 10948–10968.  
702  
703 Vogel, C., and Marcotte, E.M. (2012). Insights into the regulation of protein abundance from  
704 proteomic and transcriptomic analyses. *Nat. Rev. Genet.* *13*, 227–232.  
705  
706 Walker, M.J., Shortridge, M.D., Albin, D.D., Cominsky, L.Y., and Varani, G. (2020). Structure  
707 of the RNA Specialized Translation Initiation Element that Recruits eIF3 to the 5'-UTR of c-Jun.  
708 *J. Mol. Biol.* *432*, 1841–1855.  
709  
710 Weinberg, D.E., Shah, P., Eichhorn, S.W., Hussmann, J.A., Plotkin, J.B., and Bartel, D.P. (2016).  
711 Improved Ribosome-Footprint and mRNA Measurements Provide Insights into Dynamics and  
712 Regulation of Yeast Translation. *Cell Rep.* *14*, 1787–1799.  
713  
714 Weinert, B.T., Schölz, C., Wagner, S.A., Iesmantavicius, V., Su, D., Daniel, J.A., and Choudhary,  
715 C. (2013). Lysine succinylation is a frequently occurring modification in prokaryotes and  
716 eukaryotes and extensively overlaps with acetylation. *Cell Rep.* *4*, 842–851.  
717  
718 Zid, B.M., and O'Shea, E.K. (2014). Promoter sequences direct cytoplasmic localization and  
719 translation of mRNAs during starvation in yeast. *Nature* *514*, 117–121.  
720  
721 Zinshteyn, B., Rojas Duran, M.F., and Gilbert, W. V (2017). Translation initiation factor eIF4G1  
722 preferentially binds yeast transcript leaders containing conserved oligo-uridine motifs. *RNA*  
723 *rna.062059.117*.  
724
